# Supplementary material
Source: HighWire-hosted journal article supplement (https://www.ghspjournal.org/highwire/filestream/2403/field_highwire_adjunct_files/0/18-00083-Yadav-Supplement.pdf)
Supplement: 18-00083-Yadav-Supplement.pdf [file 18-00083-Yadav-Supplement.pdf]

**SUPPLEMENT. Supply Chain Management System Survey Tool**

|                                      |                                         |                                                                                                                                                                                                                             |                                                                   |
|--------------------------------------|-----------------------------------------|-----------------------------------------------------------------------------------------------------------------------------------------------------------------------------------------------------------------------------|-------------------------------------------------------------------|
|                                      | <b>INTERVIEWER NAME:</b>                |                                                                                                                                                                                                                             |                                                                   |
|                                      | <b>DATE:</b>                            |                                                                                                                                                                                                                             |                                                                   |
|                                      | <b>INTERVIEW START TIME: hh:mm</b>      |                                                                                                                                                                                                                             |                                                                   |
|                                      |                                         |                                                                                                                                                                                                                             |                                                                   |
|                                      | <b>SECTION 1. CONTACT INFO</b>          | <b>RESPONSE</b>                                                                                                                                                                                                             | <b>NOTES/SKIP PATTERN</b>                                         |
| 1.1                                  | Interviewee ID                          |                                                                                                                                                                                                                             |                                                                   |
| 1.2                                  | COMPANY NAME                            |                                                                                                                                                                                                                             |                                                                   |
| 1.3                                  | COMPANY ADDRESS                         |                                                                                                                                                                                                                             |                                                                   |
| 1.4                                  | May I begin the interview now?          | 1. <input type="checkbox"/> YES<br>2. <input type="checkbox"/> NO                                                                                                                                                           | Check one<br>*If "No", thank respondent and discontinue interview |
| <b>SECTION 2. ABOUT YOUR COMPANY</b> |                                         |                                                                                                                                                                                                                             |                                                                   |
| 2.1                                  | What is your position in this company?  | 1. <input type="checkbox"/> Managing Director<br>2. <input type="checkbox"/> Owner<br>96. <input type="checkbox"/> Other (specify) _____<br>98. <input type="checkbox"/> Refused<br>99. <input type="checkbox"/> Don't know |                                                                   |
| 2.2                                  | What year was this company established? |                                                                                                                                                                                                                             |                                                                   |

|     |                                                                                                          |                                                                                                                                                                                                                                                                                                                                                                                                                                    |                                                         |
|-----|----------------------------------------------------------------------------------------------------------|------------------------------------------------------------------------------------------------------------------------------------------------------------------------------------------------------------------------------------------------------------------------------------------------------------------------------------------------------------------------------------------------------------------------------------|---------------------------------------------------------|
| 2.3 | What type of company is this business registered as in this country?                                     | 1. <input type="checkbox"/> Public<br>2. <input type="checkbox"/> General Partnership<br>3. <input type="checkbox"/> Limited Liability Partnership<br>4. <input type="checkbox"/> Sole proprietorship<br>5. <input type="checkbox"/> Government owned<br>6. <input type="checkbox"/> Partially owned by government<br>96. <input type="checkbox"/> Other (specify) _____<br>98. <input type="checkbox"/> Refused<br>99. Don't know |                                                         |
| 2.4 | Does this company have any branches in other parts of this country or abroad?                            | 1. <input type="checkbox"/> Yes<br>2. <input type="checkbox"/> No<br>98. <input type="checkbox"/> Refused<br>99. <input type="checkbox"/> Don't know                                                                                                                                                                                                                                                                               | Skip to question 2.7 if, "No", "Refused", "Don't know"  |
| 2.5 | If yes, are the branches located in other cities within this country or abroad?                          | 1. <input type="checkbox"/> In other cities within this country<br>2. <input type="checkbox"/> In other cities outside of this country<br>98. <input type="checkbox"/> Refused<br>99. <input type="checkbox"/> Don't know                                                                                                                                                                                                          |                                                         |
| 2.6 | In what specific cities are the branches located?                                                        |                                                                                                                                                                                                                                                                                                                                                                                                                                    |                                                         |
| 2.7 | Have there been any ownership changes since the company was first established?                           | 1. <input type="checkbox"/> Yes<br>2. <input type="checkbox"/> No<br>98. <input type="checkbox"/> Refused<br>99. <input type="checkbox"/> Don't know                                                                                                                                                                                                                                                                               | Skip to question 2.9 if, "No", "Refused", "Don't know"  |
| 2.8 | If yes, in what year?                                                                                    |                                                                                                                                                                                                                                                                                                                                                                                                                                    |                                                         |
| 2.9 | Have there been any changes in the management structure of this business since it was first established? | 1. <input type="checkbox"/> Yes<br>2. <input type="checkbox"/> No<br>98. <input type="checkbox"/> Refused<br>99. <input type="checkbox"/> Don't know                                                                                                                                                                                                                                                                               | Skip to question 2.11 if, "No", "Refused", "Don't know" |

|      |                                                                                                                                      |                                                                                                                                                                                                                                                                                                                                                                                                                       |                                |
|------|--------------------------------------------------------------------------------------------------------------------------------------|-----------------------------------------------------------------------------------------------------------------------------------------------------------------------------------------------------------------------------------------------------------------------------------------------------------------------------------------------------------------------------------------------------------------------|--------------------------------|
| 2.10 | If yes, in what year?                                                                                                                |                                                                                                                                                                                                                                                                                                                                                                                                                       |                                |
| 2.11 | Does this company currently provide more, less or the same types of products and services compared to when it was first established? | 1. <input type="checkbox"/> More<br>2. <input type="checkbox"/> Less<br>3. <input type="checkbox"/> The same<br>98. <input type="checkbox"/> Refused<br>99. <input type="checkbox"/> Don't know                                                                                                                                                                                                                       |                                |
| 2.12 | When this company was first established, what services did it offer?                                                                 | 1. <input type="checkbox"/> Procurement<br>2. <input type="checkbox"/> Distribution<br>3. <input type="checkbox"/> Warehousing<br>4. <input type="checkbox"/> Printing<br>5. <input type="checkbox"/> Network set-up<br>96. <input type="checkbox"/> Other (specify1) _____<br>97. <input type="checkbox"/> Other (specify2) _____<br>98. <input type="checkbox"/> Refused<br>99. <input type="checkbox"/> Don't know | more than one response allowed |

|      |                                                                      |                                                                                                                                                                                                                                                                                                                                                                                                                                                                                                                                                                                                                                                                                                                                                                                                                                                                                                                                                                                                                                                 |                                |
|------|----------------------------------------------------------------------|-------------------------------------------------------------------------------------------------------------------------------------------------------------------------------------------------------------------------------------------------------------------------------------------------------------------------------------------------------------------------------------------------------------------------------------------------------------------------------------------------------------------------------------------------------------------------------------------------------------------------------------------------------------------------------------------------------------------------------------------------------------------------------------------------------------------------------------------------------------------------------------------------------------------------------------------------------------------------------------------------------------------------------------------------|--------------------------------|
| 2.13 | When this company was first established, what products did it offer? | <ul style="list-style-type: none"> <li>1. <input type="checkbox"/> Lab Consumables</li> <li>2. <input type="checkbox"/> Lab Reagents</li> <li>3. <input type="checkbox"/> Lab Equipment</li> <li>4. <input type="checkbox"/> Pharmaceuticals (human)</li> <li>5. <input type="checkbox"/> Cold Chain for heat sensitive products</li> <li>6. <input type="checkbox"/> Electrical Equipment</li> <li>7. <input type="checkbox"/> IT equipment</li> <li>8. <input type="checkbox"/> IT supplies</li> <li>9. <input type="checkbox"/> Office Supplies</li> <li>10. <input type="checkbox"/> Handling Equipment of Warehouse</li> <li>11. <input type="checkbox"/> Pallets for Warehouse</li> <li>12. <input type="checkbox"/> Security equipment</li> <li>13. <input type="checkbox"/> Pharmaceuticals (animals)</li> <li>96. <input type="checkbox"/> Other (specify1)_____</li> <li>97. <input type="checkbox"/> Other (specify2)_____</li> <li>98. <input type="checkbox"/> Refused</li> <li>99. <input type="checkbox"/> Don't know</li> </ul> |                                |
| 2.14 | What type of services does this company currently offer?             | <ul style="list-style-type: none"> <li>1. <input type="checkbox"/> Procurement</li> <li>2. <input type="checkbox"/> Distribution</li> <li>3. <input type="checkbox"/> Warehousing</li> <li>4. <input type="checkbox"/> Printing</li> <li>5. <input type="checkbox"/> Network set-up</li> <li>96. <input type="checkbox"/> Other (specify1)_____</li> <li>97. <input type="checkbox"/> Other (specify2)_____</li> <li>98. <input type="checkbox"/> Refused</li> <li>99. <input type="checkbox"/> Don't know</li> </ul>                                                                                                                                                                                                                                                                                                                                                                                                                                                                                                                           | more than one response allowed |

|                                        |                                                                 |                                                                                                                                                                                                                                                                                                                                                                                                                                                                                                                                                                                                                                                                                                                                                                                                                                                                                                                  |  |
|----------------------------------------|-----------------------------------------------------------------|------------------------------------------------------------------------------------------------------------------------------------------------------------------------------------------------------------------------------------------------------------------------------------------------------------------------------------------------------------------------------------------------------------------------------------------------------------------------------------------------------------------------------------------------------------------------------------------------------------------------------------------------------------------------------------------------------------------------------------------------------------------------------------------------------------------------------------------------------------------------------------------------------------------|--|
| 2.15                                   | What type of products does this company currently offer?        | <ul style="list-style-type: none"> <li>1. <input type="checkbox"/> Lab Consumables</li> <li>2. <input type="checkbox"/> Lab Reagents</li> <li>3. <input type="checkbox"/> Lab Equipment</li> <li>4. <input type="checkbox"/> Pharmaceuticals</li> <li>5. <input type="checkbox"/> Cold Chain for heat sensitive products</li> <li>6. <input type="checkbox"/> Electrical Equipment</li> <li>7. <input type="checkbox"/> IT equipment</li> <li>8. <input type="checkbox"/> IT supplies</li> <li>9. <input type="checkbox"/> Office Supplies</li> <li>10. <input type="checkbox"/> Handling Equipment of Warehouse</li> <li>11. <input type="checkbox"/> Pallets for Warehouse</li> <li>96. <input type="checkbox"/> Other (specify1) _____</li> <li>97. <input type="checkbox"/> Other (specify2) _____</li> <li>98. <input type="checkbox"/> Refused</li> <li>99. <input type="checkbox"/> Don't know</li> </ul> |  |
| 2.16                                   | Approximate annual revenue?                                     |                                                                                                                                                                                                                                                                                                                                                                                                                                                                                                                                                                                                                                                                                                                                                                                                                                                                                                                  |  |
| <b>SECTION 3: ABOUT SCMS CONTRACTS</b> |                                                                 |                                                                                                                                                                                                                                                                                                                                                                                                                                                                                                                                                                                                                                                                                                                                                                                                                                                                                                                  |  |
| 3.1                                    | Do you currently have an active contract with SCMS?             | <ul style="list-style-type: none"> <li>1. <input type="checkbox"/> Yes</li> <li>2. <input type="checkbox"/> No</li> <li>98. <input type="checkbox"/> Refused</li> <li>99. <input type="checkbox"/> Don't know</li> </ul>                                                                                                                                                                                                                                                                                                                                                                                                                                                                                                                                                                                                                                                                                         |  |
| 3.2                                    | To date, how many SCMS contracts has your company been awarded? | <ul style="list-style-type: none"> <li>1. <input type="checkbox"/> one</li> <li>2. <input type="checkbox"/> two</li> <li>3. <input type="checkbox"/> three</li> <li>4. <input type="checkbox"/> four</li> <li>5. <input type="checkbox"/> five</li> <li>96. <input type="checkbox"/> other (specify) _____</li> <li>98. <input type="checkbox"/> Refused</li> <li>99. <input type="checkbox"/> Don't know</li> </ul>                                                                                                                                                                                                                                                                                                                                                                                                                                                                                             |  |

|     |                                                                                                                                                                                        |                                                                                                                                                                                                                                                                                                                                                                                                                                                                                                                                                                                                                                                                                                                                                                                                                                           |                                                               |
|-----|----------------------------------------------------------------------------------------------------------------------------------------------------------------------------------------|-------------------------------------------------------------------------------------------------------------------------------------------------------------------------------------------------------------------------------------------------------------------------------------------------------------------------------------------------------------------------------------------------------------------------------------------------------------------------------------------------------------------------------------------------------------------------------------------------------------------------------------------------------------------------------------------------------------------------------------------------------------------------------------------------------------------------------------------|---------------------------------------------------------------|
| 3.3 | <p>A. In what year(s) did you have an active SCMS contract award?</p> <p>B. What was the value of the award?</p> <p>C. The contract equated to what % of company's annual revenue?</p> | <p>YEAR OF AWARD</p> <p>1. <input type="checkbox"/> 2007</p> <p>2. <input type="checkbox"/> 2008</p> <p>3. <input type="checkbox"/> 2009</p> <p>4. <input type="checkbox"/> 2010</p> <p>5. <input type="checkbox"/> 2011</p> <p>6. <input type="checkbox"/> 2012</p> <p>7. <input type="checkbox"/> 2013</p> <p>96. <input type="checkbox"/> Other (specify) _____</p> <p>98. <input type="checkbox"/> Refused</p> <p>99. <input type="checkbox"/> Don't know</p>                                                                                                                                                                                                                                                                                                                                                                         | VALUE                                                         |
| 3.4 | <p>PRODUCTS AND SERVICES UNDER CONTRACT AWARD 1</p>                                                                                                                                    | <p>1. <input type="checkbox"/> Lab Consumables</p> <p>2. <input type="checkbox"/> Lab Reagents</p> <p>3. <input type="checkbox"/> Lab Equipment</p> <p>4. <input type="checkbox"/> Pharmaceuticals</p> <p>5. <input type="checkbox"/> Cold Chain for heat sensitive products</p> <p>6. <input type="checkbox"/> Electrical Equipment</p> <p>7. <input type="checkbox"/> IT equipment</p> <p>8. <input type="checkbox"/> IT supplies</p> <p>9. <input type="checkbox"/> Office Supplies</p> <p>10. <input type="checkbox"/> Handling Equipment of Warehouse</p> <p>11. <input type="checkbox"/> Pallets for Warehouse</p> <p>96. <input type="checkbox"/> Other (specify1) _____</p> <p>97. <input type="checkbox"/> Other (specify2) _____</p> <p>98. <input type="checkbox"/> Refused</p> <p>99. <input type="checkbox"/> Don't know</p> |                                                               |
| 3.5 | <p>In order to fulfill the terms of your contract with SCMS, have you ever had to contract any other businesses (i.e, distributors/transporters, engineers, etc)?</p>                  | <p>1. <input type="checkbox"/> Yes</p> <p>2. <input type="checkbox"/> No</p> <p>98. <input type="checkbox"/> Refused</p> <p>99. <input type="checkbox"/> Don't know</p>                                                                                                                                                                                                                                                                                                                                                                                                                                                                                                                                                                                                                                                                   | <p>If "no", "refused", "don't know" skip to question 3.11</p> |

|      |                                                                                                                                                                                 |                                                                                                                                                                                                                                                                                                                                       |                                                                                                 |
|------|---------------------------------------------------------------------------------------------------------------------------------------------------------------------------------|---------------------------------------------------------------------------------------------------------------------------------------------------------------------------------------------------------------------------------------------------------------------------------------------------------------------------------------|-------------------------------------------------------------------------------------------------|
| 3.6  | If yes, what type?                                                                                                                                                              | BUSINESS TYPE                                                                                                                                                                                                                                                                                                                         | VALUE OF CONTRACT                                                                               |
| 3.7  | How many employees currently work here?                                                                                                                                         | 1. <input type="checkbox"/> Less than 10<br>2. <input type="checkbox"/> 10-24<br>3. <input type="checkbox"/> 25-49<br>4. <input type="checkbox"/> 50-74<br>5. <input type="checkbox"/> 75-99<br>96. <input type="checkbox"/> Other (specify) _____<br>98. <input type="checkbox"/> Refused<br>99. <input type="checkbox"/> Don't know | check one                                                                                       |
| 3.8  | Since the time you were first awarded an SCMS contract, has the number of employees working at this company increased, decreased, or stayed the same?                           | 1. <input type="checkbox"/> Increased<br>2. <input type="checkbox"/> Decreased<br>3. <input type="checkbox"/> Remained about the same<br>96. <input type="checkbox"/> Other<br>98. <input type="checkbox"/> Refused<br>99. <input type="checkbox"/> Don't know                                                                        | check one<br>Skip to question 3.12 if 'decreased', 'remained the same', 'refused', 'don't know' |
| 3.9  | By how many has the number increased/decreased?                                                                                                                                 | 1. <input type="checkbox"/> Increased _____<br>2. <input type="checkbox"/> Decreased _____<br>96. <input type="checkbox"/> Other<br>98. <input type="checkbox"/> Refused<br>99. <input type="checkbox"/> Don't know                                                                                                                   |                                                                                                 |
| 3.10 | To the best of your ability- please list all the positions in your company, education level, the number employed in those positions, required and the approximate salary range. | POSITION TYPE<br>EMPLOYED<br>1.<br>2.<br>3.<br>4.<br>5.<br>6.<br>7.<br>8.                                                                                                                                                                                                                                                             | EDUCATION #<br>SALARY RANGE                                                                     |

|                                              |                                                                                                                                            |                                                                                                                                                                                                                                                                                                                                                                |                                                        |
|----------------------------------------------|--------------------------------------------------------------------------------------------------------------------------------------------|----------------------------------------------------------------------------------------------------------------------------------------------------------------------------------------------------------------------------------------------------------------------------------------------------------------------------------------------------------------|--------------------------------------------------------|
|                                              |                                                                                                                                            | 9.<br>10.<br>11.<br>12.<br>13.<br>14.<br>15.                                                                                                                                                                                                                                                                                                                   |                                                        |
| 3.11                                         | Prior to being awarded the SCMS contract, did you offer any trainings to your employees?                                                   | 1. <input type="checkbox"/> Yes<br>2. <input type="checkbox"/> No<br>98. <input type="checkbox"/> Refused<br>99. <input type="checkbox"/> Don't know                                                                                                                                                                                                           | Skip to question 3.15 if "No", "Refused", "Don't know" |
| 3.12                                         | If yes, what type of trainings did you offer? How Frequently? # Trained per Session                                                        | TRAINING TYPE<br>#Trained<br>1. <input type="checkbox"/> Management<br>2. <input type="checkbox"/> Financial/Accounting<br>3. <input type="checkbox"/> Safety<br>96. <input type="checkbox"/> Other (specify1) _____<br>97. <input type="checkbox"/> Other (specify2) _____<br>98. <input type="checkbox"/> Refused<br>99. <input type="checkbox"/> Don't know | FREQUENCY                                              |
| 3.13                                         | Did you start offering any new trainings after you were awarded the SCMS contract?                                                         | 1. <input type="checkbox"/> Yes<br>2. <input type="checkbox"/> No<br>98. <input type="checkbox"/> Refused<br>99. <input type="checkbox"/> Don't know                                                                                                                                                                                                           | Skip to SECTION 4 if "No", "Refused", "Don't know"     |
| 3.14                                         | If yes, what type of additional trainings did you offer? How frequently? # Trained per session?                                            | TRAINING TYPE<br>#Trained<br>1. <input type="checkbox"/> Management<br>2. <input type="checkbox"/> Financial/Accounting<br>3. <input type="checkbox"/> Safety<br>96. <input type="checkbox"/> Other (specify1) _____<br>97. <input type="checkbox"/> Other (specify2) _____<br>98. <input type="checkbox"/> Refused<br>99. <input type="checkbox"/> Don't know | FREQUENCY                                              |
| 3.15                                         | Beyond the value of the contract, did SCMS offer any additional support to your company in the way of technical assistance, etc? (specify) | 1. <input type="checkbox"/> Yes<br>2. <input type="checkbox"/> No<br>98. <input type="checkbox"/> Refused<br>99. <input type="checkbox"/> Don't know                                                                                                                                                                                                           |                                                        |
| <b>SECTION 4. ABOUT THE MARKET LANDSCAPE</b> |                                                                                                                                            |                                                                                                                                                                                                                                                                                                                                                                |                                                        |



|     |                                                                                                                                                           |                                                                                                                                                                                                                                                                                                   |                                                       |
|-----|-----------------------------------------------------------------------------------------------------------------------------------------------------------|---------------------------------------------------------------------------------------------------------------------------------------------------------------------------------------------------------------------------------------------------------------------------------------------------|-------------------------------------------------------|
| 4.1 | Have there been any changes in regulatory environment since your first SCMS contract award that directly affected your business?                          | 1. <input type="checkbox"/> Yes<br>2. <input type="checkbox"/> No<br>98. <input type="checkbox"/> Refused<br>99. <input type="checkbox"/> Don't know                                                                                                                                              | Skip to question 4.3 if "No", "Refused", "Don't know" |
| 4.2 | If yes, specify.                                                                                                                                          |                                                                                                                                                                                                                                                                                                   |                                                       |
| 4.3 | The year that this company was awarded its first SCMS contract, approximately how many businesses existed that provided similar services as your company? | 1. <input type="checkbox"/> 1-4<br>2. <input type="checkbox"/> 5-9<br>3. <input type="checkbox"/> 10-14<br>4. <input type="checkbox"/> 15-19<br>5. <input type="checkbox"/> 20-25<br>96. <input type="checkbox"/> other (specify) _____<br>98. <input type="checkbox"/> Refused<br>99. Don't know |                                                       |
| 4.4 | Of those businesses providing similar services as your company, approximately how many did you consider to be direct competition?                         | 1. <input type="checkbox"/> 1-4<br>2. <input type="checkbox"/> 5-9<br>3. <input type="checkbox"/> 10-14<br>4. <input type="checkbox"/> 15-19<br>5. <input type="checkbox"/> 20-25<br>96. <input type="checkbox"/> other (specify) _____<br>98. <input type="checkbox"/> Refused<br>99. Don't know |                                                       |
| 4.5 | Approximately how many businesses <b>currently</b> exist in the market that provide similar services as your company?                                     | 1. <input type="checkbox"/> 1-4<br>2. <input type="checkbox"/> 5-9<br>3. <input type="checkbox"/> 10-14<br>4. <input type="checkbox"/> 15-19<br>5. <input type="checkbox"/> 20-25<br>96. <input type="checkbox"/> other (specify) _____<br>98. <input type="checkbox"/> Refused<br>99. Don't know |                                                       |

|                                                                        |                                                                                                                                                                                          |                                                                                                                                                                                                                                                                                                   |                                                                              |
|------------------------------------------------------------------------|------------------------------------------------------------------------------------------------------------------------------------------------------------------------------------------|---------------------------------------------------------------------------------------------------------------------------------------------------------------------------------------------------------------------------------------------------------------------------------------------------|------------------------------------------------------------------------------|
| 4.6                                                                    | Approximately how many businesses <b>currently</b> exist in the market that you consider to be your direct competition?                                                                  | 1. <input type="checkbox"/> 1-4<br>2. <input type="checkbox"/> 5-9<br>3. <input type="checkbox"/> 10-14<br>4. <input type="checkbox"/> 15-19<br>5. <input type="checkbox"/> 20-25<br>96. <input type="checkbox"/> other (specify) _____<br>98. <input type="checkbox"/> Refused<br>99. Don't know |                                                                              |
| 4.7                                                                    | Since you were awarded the SCMS contract, would you say that your company has "grown", "stayed the same", or "decreased" in size and services offered?                                   | 1. <input type="checkbox"/> The company has grown<br>2. <input type="checkbox"/> The company has stayed about the same<br>3. <input type="checkbox"/> The company has decreased<br>98. <input type="checkbox"/> Refused<br>99. <input type="checkbox"/> Don't know                                | Skip to SECTION 5 if "stayed the same", "decreased", "refused", "don't know" |
| 4.8                                                                    | If your company has grown, would you say that your main competitors have grown as much?                                                                                                  | 1. <input type="checkbox"/> Yes<br>2. <input type="checkbox"/> No<br>3. <input type="checkbox"/> Other companies have grown more<br>98. <input type="checkbox"/> Refused<br>99. <input type="checkbox"/> Don't know                                                                               |                                                                              |
| 4.9                                                                    | What percentage annual growth are you experiencing?                                                                                                                                      |                                                                                                                                                                                                                                                                                                   |                                                                              |
| <b>SECTION 5. ABOUT COMPANY ASSETS , ACCESS TO CREDIT, DEBT LEVELS</b> |                                                                                                                                                                                          |                                                                                                                                                                                                                                                                                                   |                                                                              |
| 5.1                                                                    | Did the number of tenders you won with other Government, bilateral, or multilateral agencies increase, decrease or stay the same after [SAY YEAR they were awarded first SCMS contract]? | 1. <input type="checkbox"/> Increased<br>2. <input type="checkbox"/> Decreased<br>3. <input type="checkbox"/> Stayed the same<br>96. <input type="checkbox"/> Other (specify)) _____<br>98. <input type="checkbox"/> Refused<br>99. <input type="checkbox"/> Don't know                           |                                                                              |

|     |                                                                                                                                                  |                                                                                                                                                                                                                                                                                                                                                                                                             |  |
|-----|--------------------------------------------------------------------------------------------------------------------------------------------------|-------------------------------------------------------------------------------------------------------------------------------------------------------------------------------------------------------------------------------------------------------------------------------------------------------------------------------------------------------------------------------------------------------------|--|
| 5.2 | Did the number of businesses you do regular business increase, decrease or stay the same after [SAY YEAR they were awarded first SCMS contract]? | 1. <input type="checkbox"/> Increased<br>2. <input type="checkbox"/> Decreased<br>3. <input type="checkbox"/> Stayed the same<br>96. <input type="checkbox"/> Other (specify) _____<br>98. <input type="checkbox"/> Refused<br>99. <input type="checkbox"/> Don't know                                                                                                                                      |  |
| 5.3 | What are the major new accounts you have won since [SAY YEAR they were awarded first SCMS contract]? (specify year)                              | NAME<br>YEAR<br>1.<br>2.<br>3.<br>4.<br>5.<br>6.<br>7.                                                                                                                                                                                                                                                                                                                                                      |  |
| 5.4 | Approximately how many businesses do you do regular business with in a given year?                                                               | 1. <input type="checkbox"/> Less than 10<br>2. <input type="checkbox"/> 10-20<br>3. <input type="checkbox"/> 21-30<br>4. <input type="checkbox"/> 31-40<br>5. <input type="checkbox"/> 41-50<br>6. <input type="checkbox"/> 100<br>7. <input type="checkbox"/> 200<br>96. <input type="checkbox"/> Other (specify) _____<br>98. <input type="checkbox"/> Refused<br>99. <input type="checkbox"/> Don't know |  |

|     |                                                                                                                                                                                                                  |                                                                                                                                                                                                                                                                            |  |
|-----|------------------------------------------------------------------------------------------------------------------------------------------------------------------------------------------------------------------|----------------------------------------------------------------------------------------------------------------------------------------------------------------------------------------------------------------------------------------------------------------------------|--|
| 5.5 | Where does SCMS rank among your biggest clients in terms of contract value?                                                                                                                                      | 1. <input type="checkbox"/> SCMS is our biggest client<br>2. <input type="checkbox"/> Top 5<br>3. <input type="checkbox"/> Top 10<br>96. <input type="checkbox"/> Other (specify) _____<br>98. <input type="checkbox"/> Refused<br>99. <input type="checkbox"/> Don't know |  |
| 5.6 | Since [SAY YEAR they were awarded first SCMS contract], do you think your company's reputation has increased, decreased or stayed the same?                                                                      | 1. <input type="checkbox"/> Increased<br>2. <input type="checkbox"/> Decreased<br>3. <input type="checkbox"/> Stayed the same<br>96. <input type="checkbox"/> Other (specify) _____<br>98. <input type="checkbox"/> Refused<br>99. <input type="checkbox"/> Don't know     |  |
| 5.7 | Since [SAY YEAR they were awarded first SCMS contract], do you find that you are in a better, worse or same position to negotiate prices with your suppliers?                                                    | 1. <input type="checkbox"/> Better<br>2. <input type="checkbox"/> Worse<br>3. <input type="checkbox"/> The same<br>96. <input type="checkbox"/> Other (specify) _____<br>98. <input type="checkbox"/> Refused<br>99. <input type="checkbox"/> Don't know                   |  |
| 5.8 | Has the number of assets your company owns (e.g, vehicles, forklifts, office space, warehouses, machinery, etc.) increased, decreased or stayed the same since [SAY YEAR they were awarded first SCMS contract]? | 1. <input type="checkbox"/> Increased<br>2. <input type="checkbox"/> Decreased<br>3. <input type="checkbox"/> Stayed the same<br>96. <input type="checkbox"/> Other (specify) _____<br>98. <input type="checkbox"/> Refused<br>99. <input type="checkbox"/> Don't know     |  |
| 5.9 | Estimated value of new assets obtained since [SAY YEAR they were awarded first SCMS contract]?                                                                                                                   |                                                                                                                                                                                                                                                                            |  |

|                                                                |                                                                                                                                                                      |                                                                                                                                                                                                                                                                        |                                                     |
|----------------------------------------------------------------|----------------------------------------------------------------------------------------------------------------------------------------------------------------------|------------------------------------------------------------------------------------------------------------------------------------------------------------------------------------------------------------------------------------------------------------------------|-----------------------------------------------------|
| 5.10                                                           | Has your company's ability to access credit, loans, bank facilities, increased, decreased or stayed the same since [SAY YEAR they were awarded first SCMS contract]? | 1. <input type="checkbox"/> Increased<br>2. <input type="checkbox"/> Decreased<br>3. <input type="checkbox"/> Stayed the same<br>96. <input type="checkbox"/> Other (specify) _____<br>98. <input type="checkbox"/> Refused<br>99. <input type="checkbox"/> Don't know |                                                     |
| 5.11                                                           | While working to fulfill the SCMS contract, were monies owed to you by SCMS ever delayed (i.e., paid outside of agreed payment period)?                              | 1. <input type="checkbox"/> Yes<br>2. <input type="checkbox"/> No<br>3. <input type="checkbox"/> On some occasions<br>98. <input type="checkbox"/> Refused<br>99. <input type="checkbox"/> Don't know                                                                  |                                                     |
| 5.12                                                           | While working to fulfill the SCMS contract, were you able to pay your suppliers on time?                                                                             | 1. <input type="checkbox"/> Yes<br>2. <input type="checkbox"/> No<br>98. <input type="checkbox"/> Refused<br>99. <input type="checkbox"/> Don't know                                                                                                                   | Skip to SECTION 6 if "Yes", "Refused", "Don't know" |
| 5.13                                                           | If no, why not?                                                                                                                                                      |                                                                                                                                                                                                                                                                        |                                                     |
| <b>SECTION 6: ABOUT YOUR COMPANY'S EFFICIENCY/PRODUCTIVITY</b> |                                                                                                                                                                      |                                                                                                                                                                                                                                                                        |                                                     |
| 6.1                                                            | Have you made investments in business systems, software to improve operations?                                                                                       | 1. <input type="checkbox"/> Yes<br>2. <input type="checkbox"/> No<br>98. <input type="checkbox"/> Refused<br>99. <input type="checkbox"/> Don't know                                                                                                                   |                                                     |
| 6.2                                                            | If yes, of what nature?                                                                                                                                              |                                                                                                                                                                                                                                                                        |                                                     |
| 6.3                                                            | Have you established new standard operating procedures?                                                                                                              | 1. <input type="checkbox"/> Yes<br>2. <input type="checkbox"/> No<br>98. <input type="checkbox"/> Refused<br>99. <input type="checkbox"/> Don't know                                                                                                                   |                                                     |
| 6.4                                                            | If yes, for what? (when?)                                                                                                                                            |                                                                                                                                                                                                                                                                        |                                                     |
| 6.5                                                            | Any final comments                                                                                                                                                   |                                                                                                                                                                                                                                                                        |                                                     |
|                                                                | <b>THANK RESPONDENT AND END INTERVIEW</b>                                                                                                                            |                                                                                                                                                                                                                                                                        |                                                     |
